# Supplementary material for: Optimal fludarabine lymphodepletion is associated with improved outcomes after CAR T-cell therapy
Source: PubMed Central journal article supplement — Blood Adv. 2022 Mar 25;6(7):1961–8. doi: 10.1182/bloodadvances.2021006418 (PMC9006295; doi:10.1182/bloodadvances.2021006418), 2022-03-25
Supplement: advancesADV2021006418-suppl1.pdf [file advancesADV2021006418-suppl1.pdf]

**Supplementary Appendix**

**Table of Contents:**

**Supplementary Table 1..... 1**

**Supplementary Table 2..... 3**

**Supplementary Table 3..... 4**

**Supplementary Table 4.....5**

**Supplementary Figure 1 ..... 6**

**Supplementary Figure 2.....7**

## Supplementary Tables and Figures

**Table S1:** Patient characteristics and outcomes

|                                                 |              |
|-------------------------------------------------|--------------|
| <b>Patient characteristics</b>                  | n=152        |
| <b>Median age at infusion</b> (years; (range))  | 12.5 (<1-26) |
| <b>Median age at diagnosis</b> (years; (range)) | 8 (<1-25)    |
| <b>Gender</b> (male/female)                     | 93/59        |
| <b>Race</b>                                     |              |
| Asian                                           | 6 (4%)       |
| Black                                           | 7 (5%)       |
| Hispanic                                        | 58 (39%)     |
| More than 1 race                                | 2 (1%)       |
| White                                           | 76 (51%)     |
| Unknown                                         | 3            |
| <b>Initial cytogenetic risk</b>                 |              |
| Favorable                                       | 22 (19%)     |
| Intermediate                                    | 42 (36%)     |
| Unfavorable                                     | 53 (45%)     |
| Unknown                                         | 35           |
| <b>Pre-infusion disease burden</b>              |              |
| No detectable disease                           | 41 (28%)     |
| Low disease                                     | 33 (22%)     |
| High disease                                    | 74 (50%)     |
| Unknown                                         | 4            |
| <b>Mean time diagnosis to infusion</b> (months) | 43 (3-164)   |
| <b>Mean number of prior lines of therapy</b>    | 3.5 (1-10)   |
| <b>Prior allo-HCT</b>                           | 8 (5%)       |
| <b>Prior CD19 directed therapy</b>              | 33 (22%)     |
| <b>Disease status</b>                           |              |
| Refractory disease                              | 24 (16%)     |
| ≥1 relapse                                      | 128 (84%)    |
| <b>Overall day 28 response</b>                  |              |
| No CR                                           | 16 (11%)     |
| CR                                              | 131 (86%)    |
| Died prior to day28                             | 5 (3%)       |

|                                     |           |
|-------------------------------------|-----------|
| <b>CRS grade</b>                    |           |
| none                                | 55 (36%)  |
| 1                                   | 36 (24%)  |
| 2                                   | 28 (18%)  |
| 3                                   | 17 (11%)  |
| 4                                   | 15 (10%)  |
| 5                                   | 1 (1%)    |
| <i>Unknown</i>                      | 1         |
| <b>Neurotoxicity grade</b>          |           |
| none                                | 116 (76%) |
| 1                                   | 17 (11%)  |
| 2                                   | 7 (5%)    |
| 3                                   | 8 (5%)    |
| 4                                   | 3 (2%)    |
| 5                                   | 1 (1%)    |
| <b>Relapsed post CAR</b>            | 55 (36%)  |
| CD19-positive relapse               | 28 (55%)  |
| CD19-negative relapse               | 23 (45%)  |
| <i>unknown</i>                      | 4         |
| <b>Loss of BCA post CAR</b>         | 52 (34%)  |
| <b>Survival status (alive/dead)</b> | 112/40    |
| <b>Cause of death</b>               |           |
| Leukemia                            | 30 (74%)  |
| Infection                           | 4 (10%)   |
| CRS                                 | 1 (2%)    |
| Neurotoxicity                       | 1 (2%)    |
| Transplant related                  | 3 (7%)    |
| ARDS/cardiac arrest                 | 1 (2%)    |

allo-HCT, allogeneic hematopoietic cell transplantation; CR, complete remission; CRS, cytokine release syndrome; CAR, chimeric antigen receptor; BCA, B cell aplasia; ARDS, acute respiratory distress syndrome

Table S2: Univariable analysis of disease characteristics and response

| <b>Characteristics</b>                         | <b>Non-responders<br/>n=16</b> | <b>Responders<br/>n=131</b> | <b>p-value</b> |
|------------------------------------------------|--------------------------------|-----------------------------|----------------|
| <b>Age at diagnosis</b>                        |                                |                             | >0.99          |
| <1 year or >10 years                           | 8 (12%)                        | 61 (88%)                    |                |
| 1 to 10 years                                  | 8 (10%)                        | 70 (90%)                    |                |
| <b>Gender (male/female)</b>                    | 10/6                           | 81/50                       | >0.99          |
| <b>Race</b>                                    |                                |                             | 0.025          |
| Black/Hispanic                                 | 12 (19%)                       | 50 (81%)                    |                |
| Others                                         | 0 (0%)                         | 8 (100%)                    |                |
| White                                          | 4 (5%)                         | 70 (95%)                    |                |
| <i>Unknown</i>                                 | 0                              | 3                           |                |
| <b>Initial cytogenetic risk</b>                |                                |                             | 0.44           |
| Favorable                                      | 4 (18%)                        | 18 (82%)                    |                |
| Intermediate                                   | 4 (10%)                        | 37 (90%)                    |                |
| Unfavorable                                    | 4 (8%)                         | 46 (92%)                    |                |
| <i>Unknown</i>                                 | 4                              | 30                          |                |
| <b>Pre-infusion disease burden</b>             |                                |                             | 0.001          |
| No or low disease                              | 1 (1%)                         | 73 (99%)                    |                |
| High disease                                   | 13 (19%)                       | 56 (81%)                    |                |
| <i>Unknown</i>                                 | 2                              | 2                           |                |
| <b>Time diagnosis to infusion<br/>(months)</b> | 36 (6-117)                     | 45 (3-164)                  | 0.44           |
| <b>Number of prior lines of therapy</b>        | 3.9 (2-7)                      | 3.4 (1-10)                  | 0.14           |
| <b>Prior allo-HCT</b>                          |                                |                             | 0.56           |
| no                                             | 15 (11%)                       | 125 (89%)                   |                |
| yes                                            | 1 (14%)                        | 6 (86%)                     |                |
| <b>Prior CD19 directed therapy</b>             |                                |                             | 0.01           |
| no                                             | 8 (7%)                         | 106 (93%)                   |                |
| yes                                            | 8 (24%)                        | 25 (76%)                    |                |
| <b>Disease status</b>                          |                                |                             | >0.99          |
| Refractory disease                             | 2 (8%)                         | 22 (92%)                    |                |
| ≥1 relapse                                     | 14 (11%)                       | 109 (89%)                   |                |

allo-HCT, allogeneic hematopoietic cell transplantation

**Table S3:** Univariable and Multivariable analysis of overall survival in all treated patients based on patient characteristics

| Characteristics                         | Univariable |           |         | Multivariable |           |                  |
|-----------------------------------------|-------------|-----------|---------|---------------|-----------|------------------|
|                                         | HR          | 95% CI    | p-value | HR            | 95% CI    | p-value          |
| <b>Sex</b>                              |             |           | 0.092   |               |           | 0.96             |
| Female                                  | Ref         |           |         | <i>Ref</i>    |           |                  |
| Male                                    | 0.59        | 0.31-1.09 |         | 0.98          | 0.50-1.97 |                  |
| <b>Number of prior lines of therapy</b> | 1.19        | 1.01-1.41 | 0.050   | 1.16          | 0.97-1.38 | 0.11             |
| <b>Time dx to infusion (months)</b>     | 0.99        | 0.98-1.00 | 0.14    |               |           |                  |
| <b>Age at diagnosis</b>                 |             |           | 0.004   |               | 0.21-0.81 | <b>0.008</b>     |
| <1 or >10 years                         | Ref         |           |         | Ref           |           |                  |
| 1 to 10 years                           | 0.39        | 0.20-0.75 |         | 0.41          |           |                  |
| <b>Pre-infusion disease burden</b>      |             |           | <0.001  |               |           | <b>&lt;0.001</b> |
| No or low disease                       | Ref         |           |         | Ref           |           |                  |
| High disease                            | 4.76        | 2.10-10.8 |         | 4.77          | 2.10-10.9 |                  |
| <b>Initial cytogenetic risk</b>         |             |           | 0.15    |               |           |                  |
| Favorable                               | Ref         |           |         |               |           |                  |
| Intermediate                            | 3.06        | 0.87-10.8 |         |               |           |                  |
| Unfavorable                             | 2.40        | 0.69-8.32 |         |               |           |                  |
| <b>Prior HCT</b>                        |             |           | 0.90    |               |           |                  |
| No                                      | Ref         |           |         |               |           |                  |
| Yes                                     | 1.09        | 0.26-4.54 |         |               |           |                  |
| <b>Prior CD19 directed therapy</b>      |             |           | 0.69    |               |           |                  |
| No                                      | Ref         |           |         |               |           |                  |
| Yes                                     | 1.16        | 0.57-2.38 |         |               |           |                  |
| <b>Prior relapse</b>                    |             |           | 0.065   |               |           | 0.055            |
| 1 or more relapse                       | Ref         |           |         | <i>Ref</i>    |           |                  |
| Refractory                              | 0.38        | 0.12-1.24 |         | 0.36          | 0.11-1.18 |                  |
| <b>CNS or EM disease</b>                |             |           | 0.64    |               |           |                  |
| No                                      | Ref         |           |         |               |           |                  |
| Yes                                     | 0.86        | 0.46-1.62 |         |               |           |                  |
| <b>Race</b>                             |             |           | 0.32    |               |           |                  |
| Black/Hispanic                          | Ref         |           |         |               |           |                  |
| Others                                  | 0.68        | 0.16-2.88 |         |               |           |                  |
| White                                   | 0.62        | 0.32-1.17 |         |               |           |                  |
| <b>Cumulative Flu AUC (mg*hr/L)</b>     |             |           | 0.22    |               |           | 0.26             |
| ≥13.8                                   | Ref         |           |         | <i>Ref</i>    |           |                  |
| <13.8                                   | 1.51        | 0.79-2.87 |         | 1.53          | 0.73-3.21 |                  |

HR, hazard ratio; CI, confidence interval; dx, diagnosis; HCT, hematopoietic cell transplantation; CNS, central nervous system; EM, extramedullary disease; flu, fludaraine; AUC, area under the curve; ref, reference

**Table S4:** Univariable analysis of disease characteristics associated with response and fludarabine exposure

| <b>Characteristics</b>             | <b>Sub-optimal<br/>(<math>&lt;13.8\text{mg}\cdot\text{hr}/\text{L}</math>)<br/>n=50</b> | <b>Optimal<br/>(<math>\geq 13.8\text{mg}\cdot\text{hr}/\text{L}</math>)<br/>n=102</b> | <b>p-value</b> |
|------------------------------------|-----------------------------------------------------------------------------------------|---------------------------------------------------------------------------------------|----------------|
| <b>Race</b>                        |                                                                                         |                                                                                       | 0.92           |
| Black/Hispanic                     | 21 (32%)                                                                                | 44 (68%)                                                                              |                |
| Others                             | 2 (25%)                                                                                 | 6 (75%)                                                                               |                |
| White                              | 26 (34%)                                                                                | 50 (66%)                                                                              |                |
| Unknown                            | 1                                                                                       | 2                                                                                     |                |
| <b>Pre-infusion disease burden</b> |                                                                                         |                                                                                       | 0.16           |
| No or low disease                  | 29 (39%)                                                                                | 45 (61%)                                                                              |                |
| High disease                       | 20 (27%)                                                                                | 54 (73%)                                                                              |                |
| Unknown                            | 1                                                                                       | 3                                                                                     |                |
| <b>Prior CD19 directed therapy</b> |                                                                                         |                                                                                       | 0.79           |
| no                                 | 38 (32%)                                                                                | 81 (68%)                                                                              |                |
| yes                                | 12 (36%)                                                                                | 21 (64%)                                                                              |                |

Supplementary Figure 1: Patient flow diagram

## Patient Flow Diagram

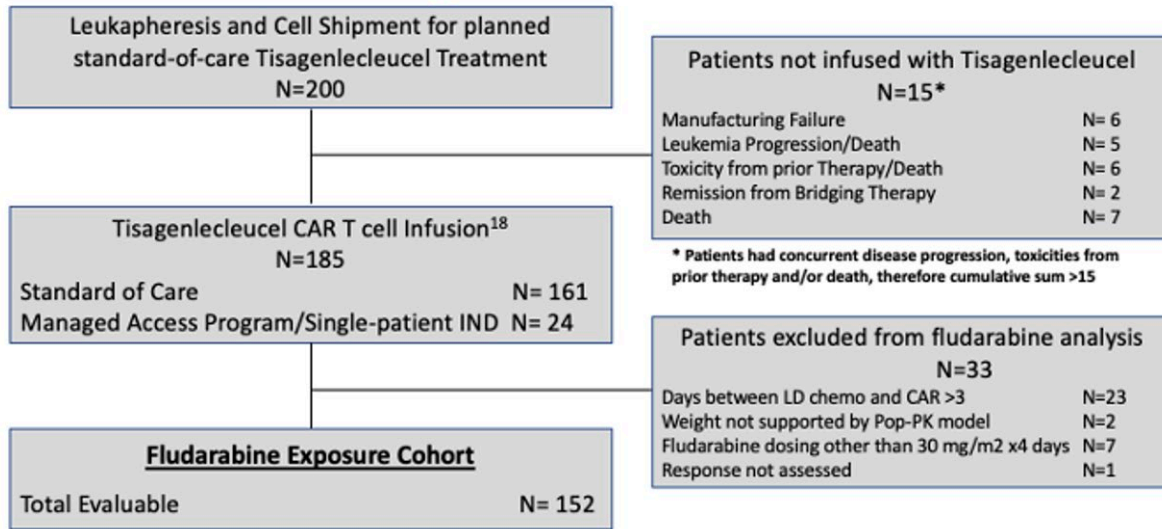

Supplementary Figure 2: The impact of fludarabine exposure and pre-infusion disease burden on overall survival in all treated patients after tisagenlecleucel infusion.

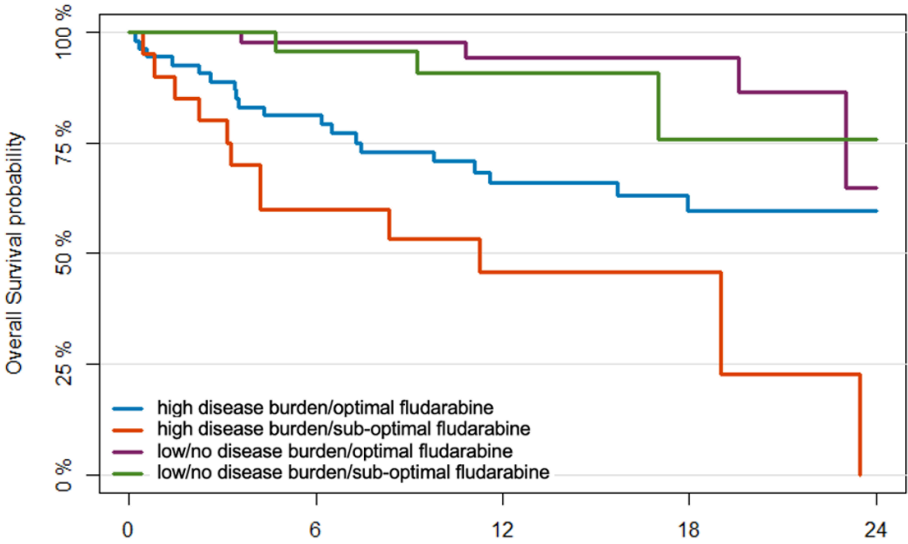

|                                                | Time from CAR T cells infusion (months) |    |    |    |    |
|------------------------------------------------|-----------------------------------------|----|----|----|----|
| At risk                                        | 0                                       | 6  | 12 | 18 | 24 |
| high disease burden/optimal fludarabine:       | 54                                      | 40 | 28 | 17 | 6  |
| high disease burden/sub-optimal fludarabine:   | 20                                      | 10 | 6  | 3  | 0  |
| low/no disease burden/optimal fludarabine:     | 45                                      | 37 | 25 | 14 | 2  |
| low/no disease burden/sub-optimal fludarabine: | 29                                      | 22 | 13 | 4  | 2  |
